# Supplementary material for: Fumarate-induced succination of A-kinase anchor protein 12 exacerbates renal inflammation and fibrosis
Source: JCI journal article supplement (doi:10.1172/jci200755), 2026-06-30

Unedited blot and gel images

Figure 1G

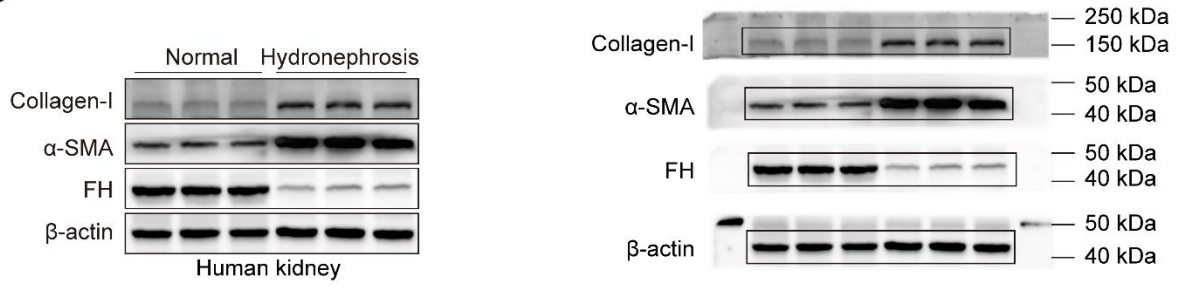

Figure 1H

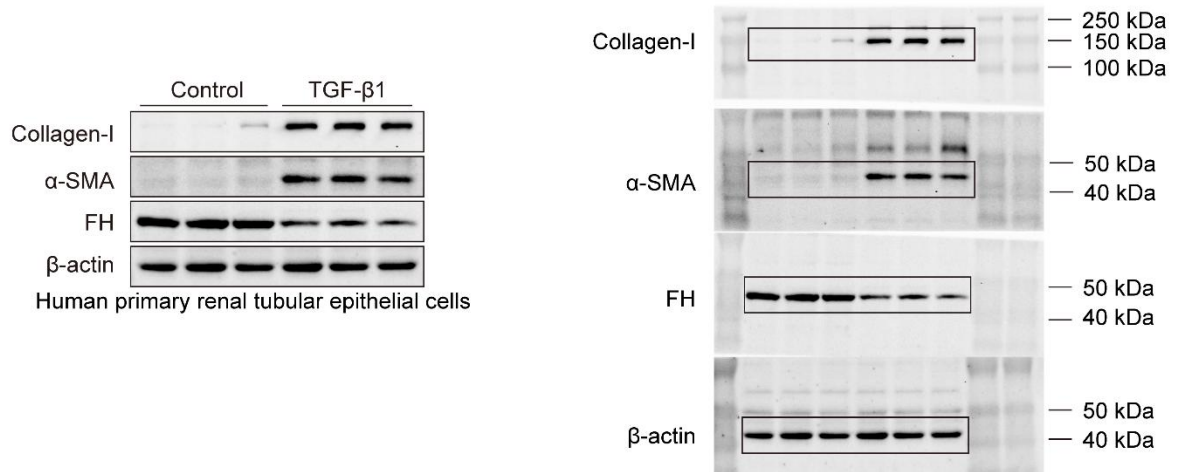

Figure 1I

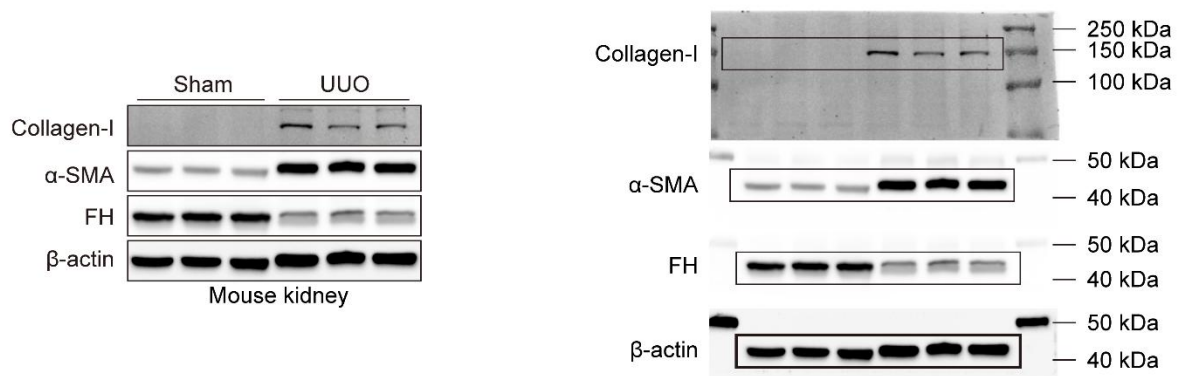

Figure 1J

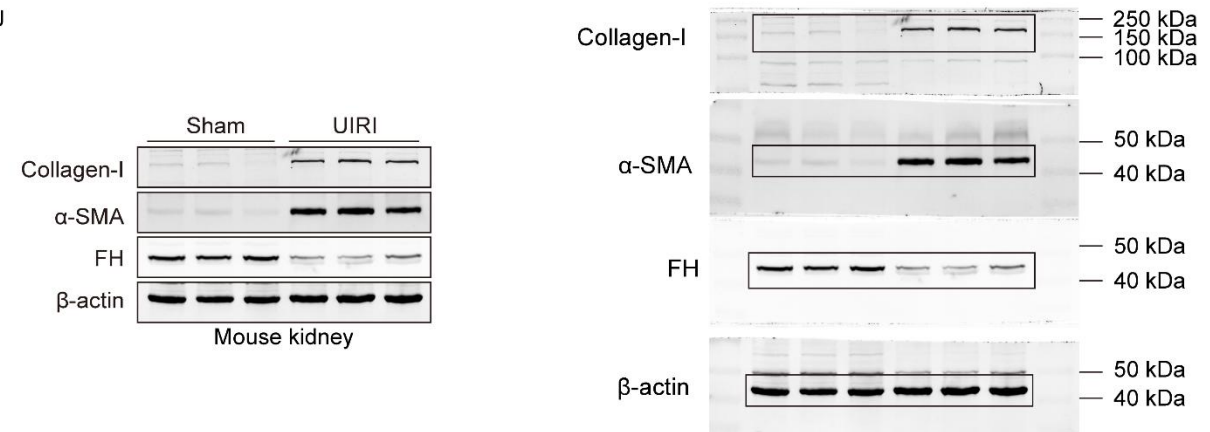

Figure 1K

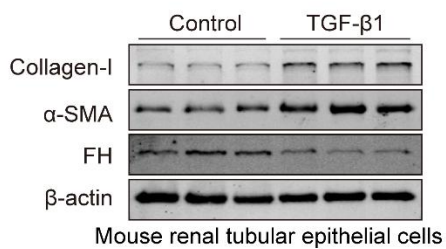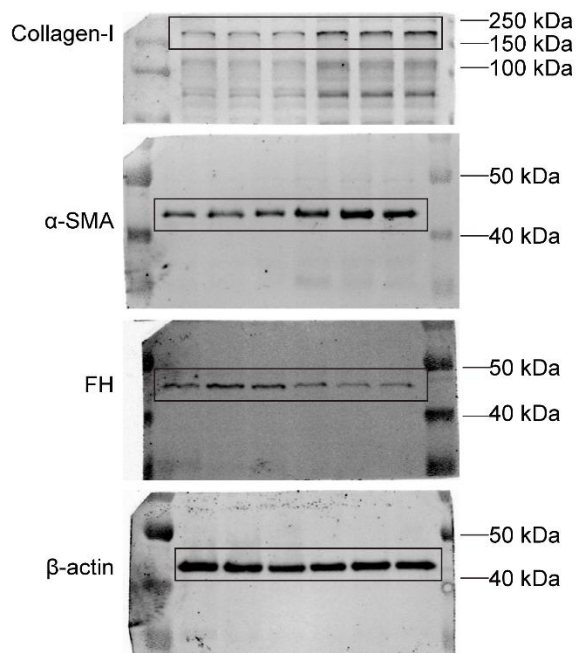

Figure 1L

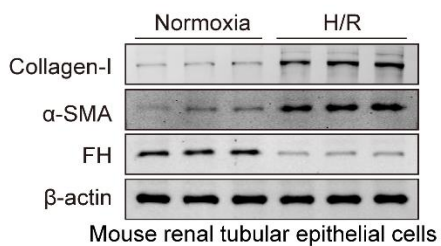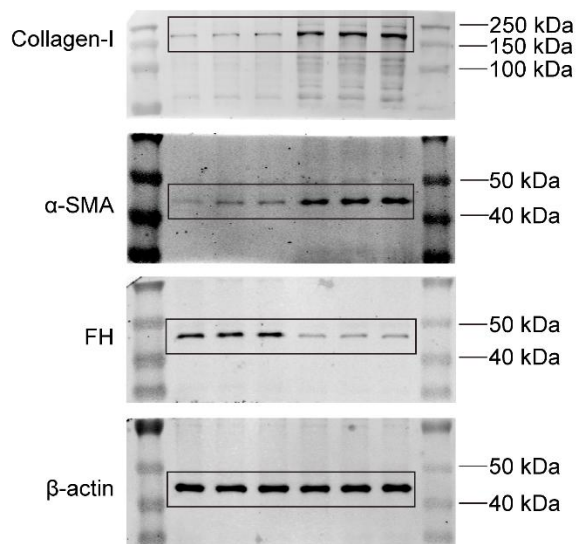

Figure 1O

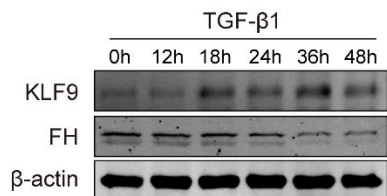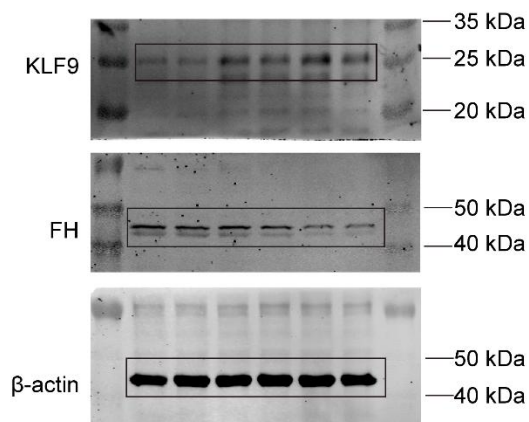

Figure 1P

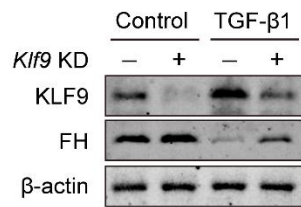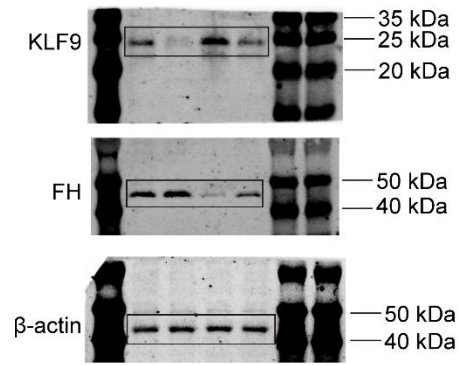

Figure 2B

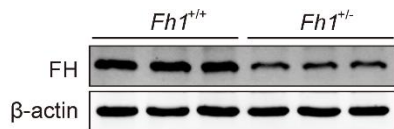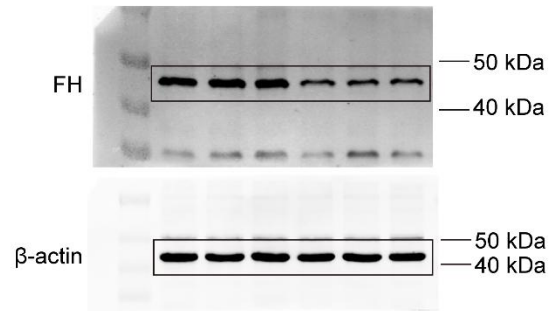

Figure 2E

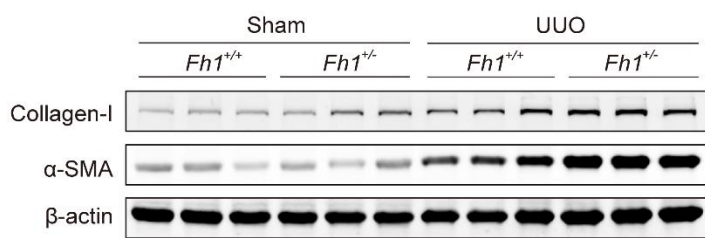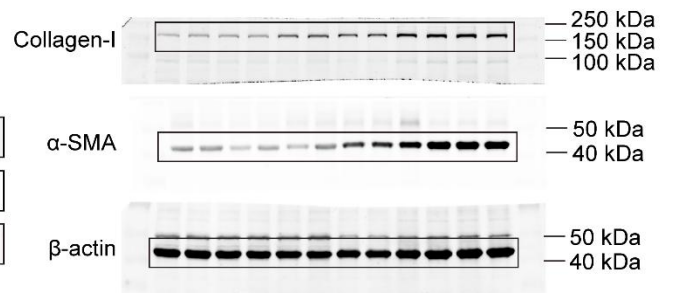

Figure 2H

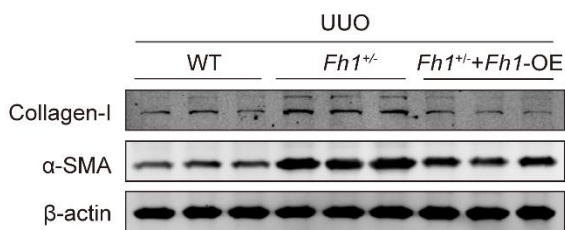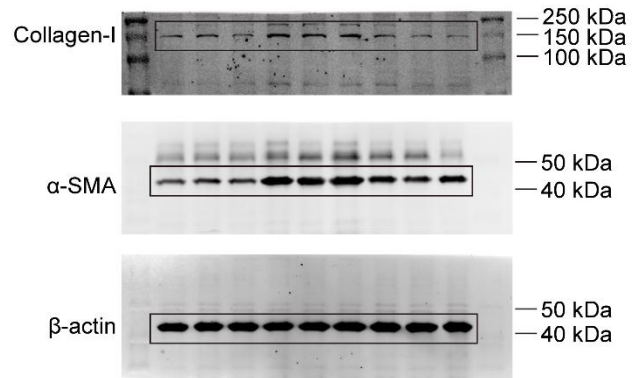

Figure 3E

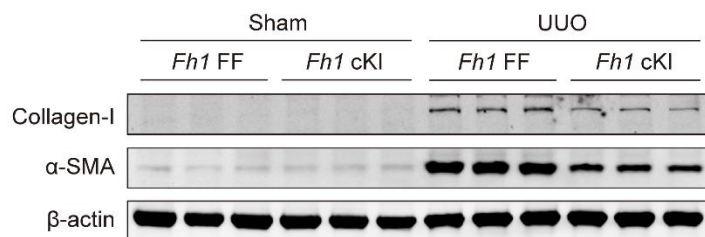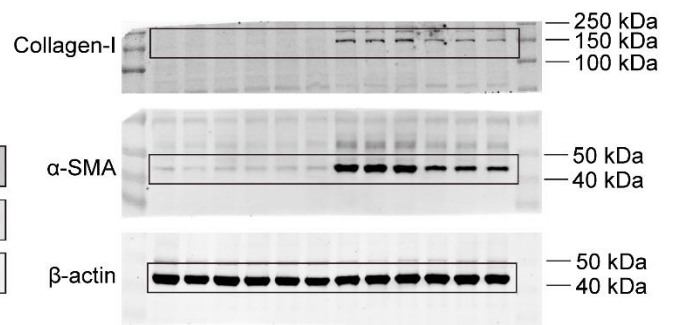

Figure 3H

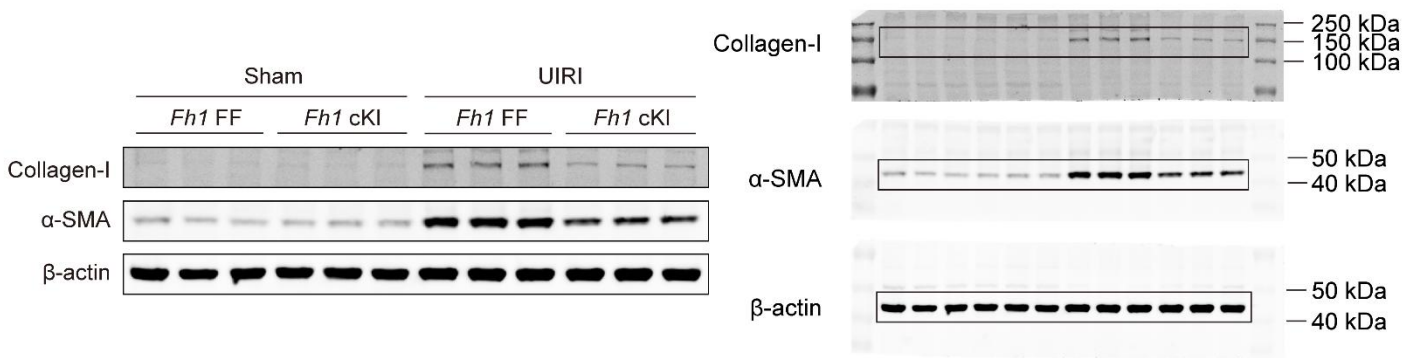

Figure 4H

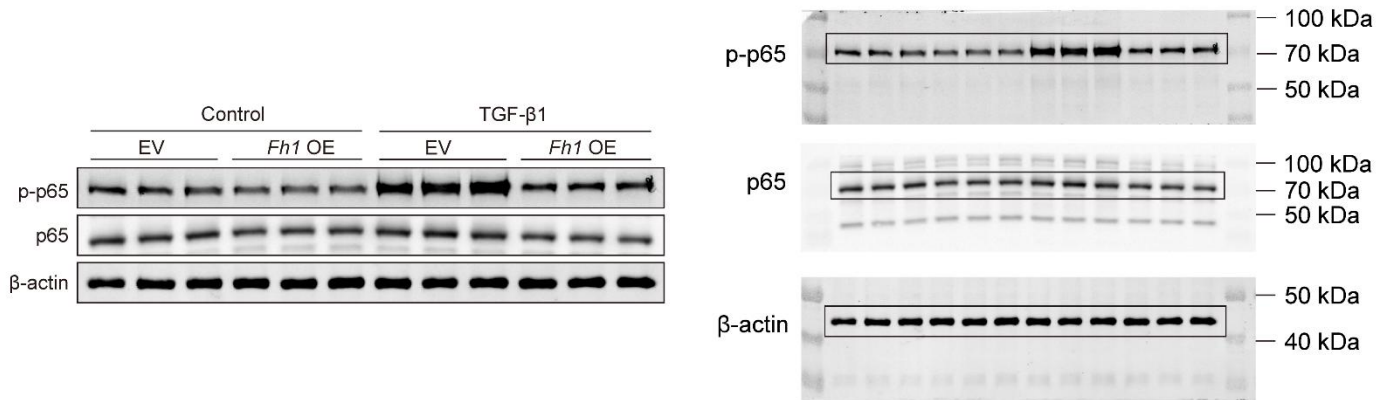

Figure 4I

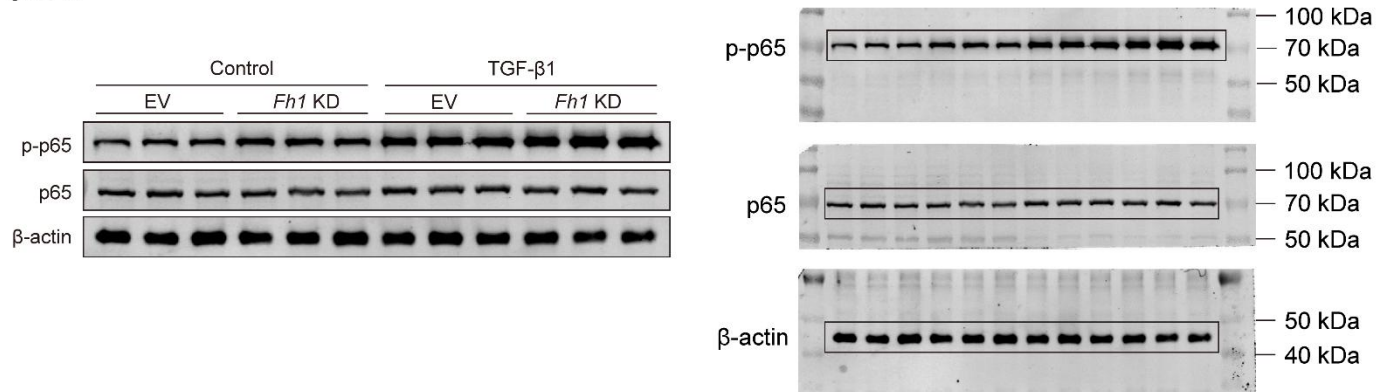

Figure 4J

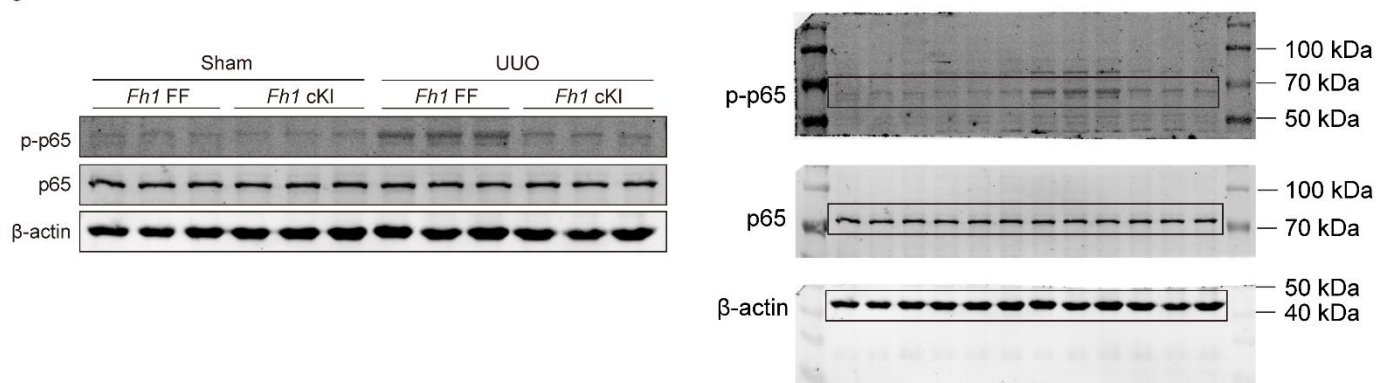

Figure 5D

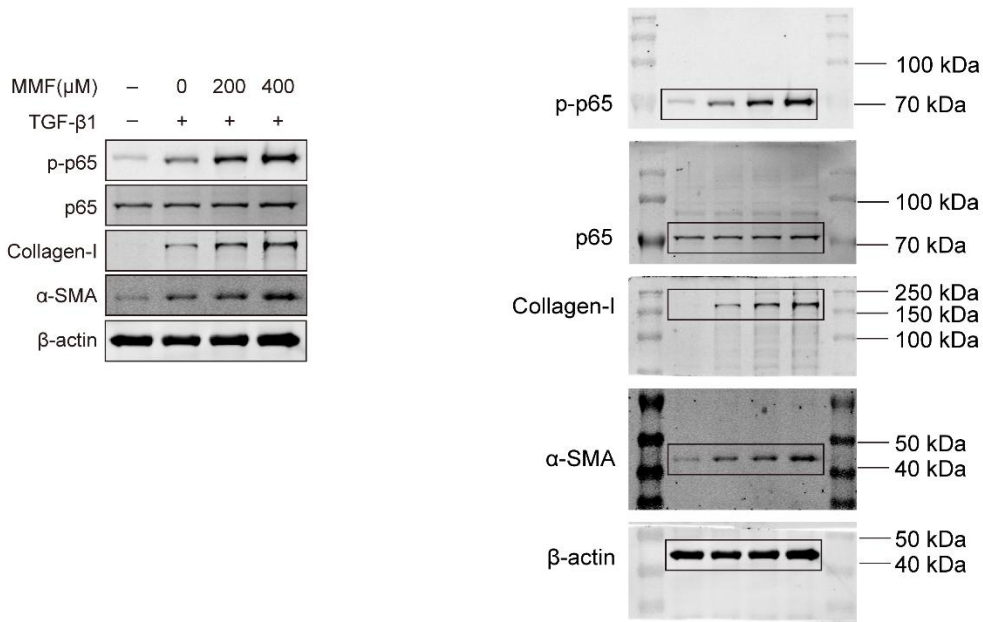

Figure 5F

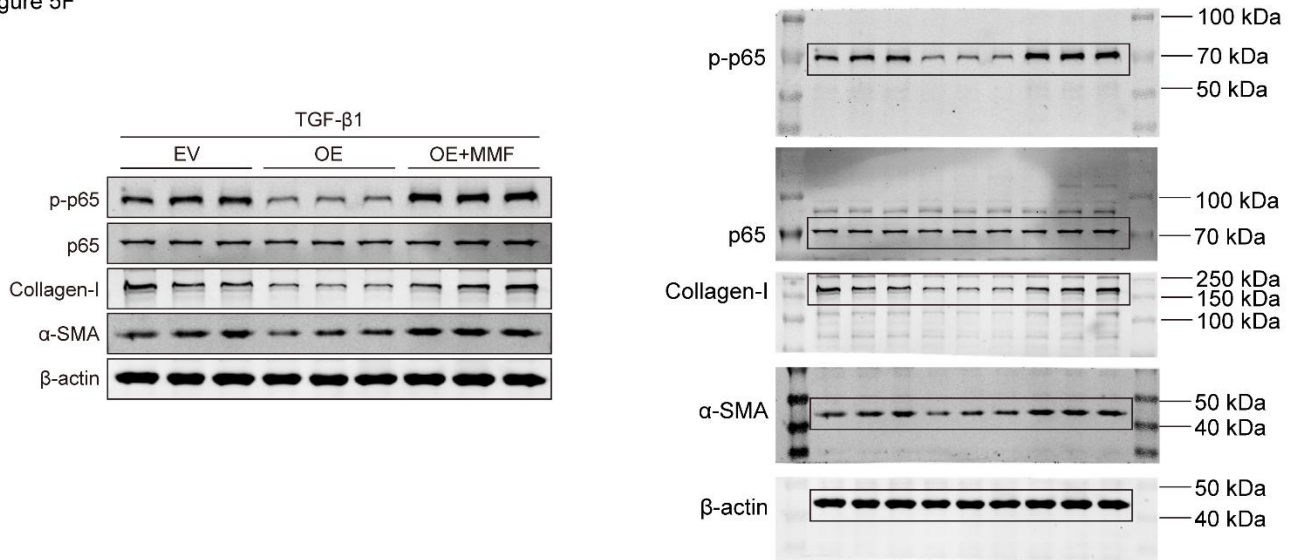

Figure 5I

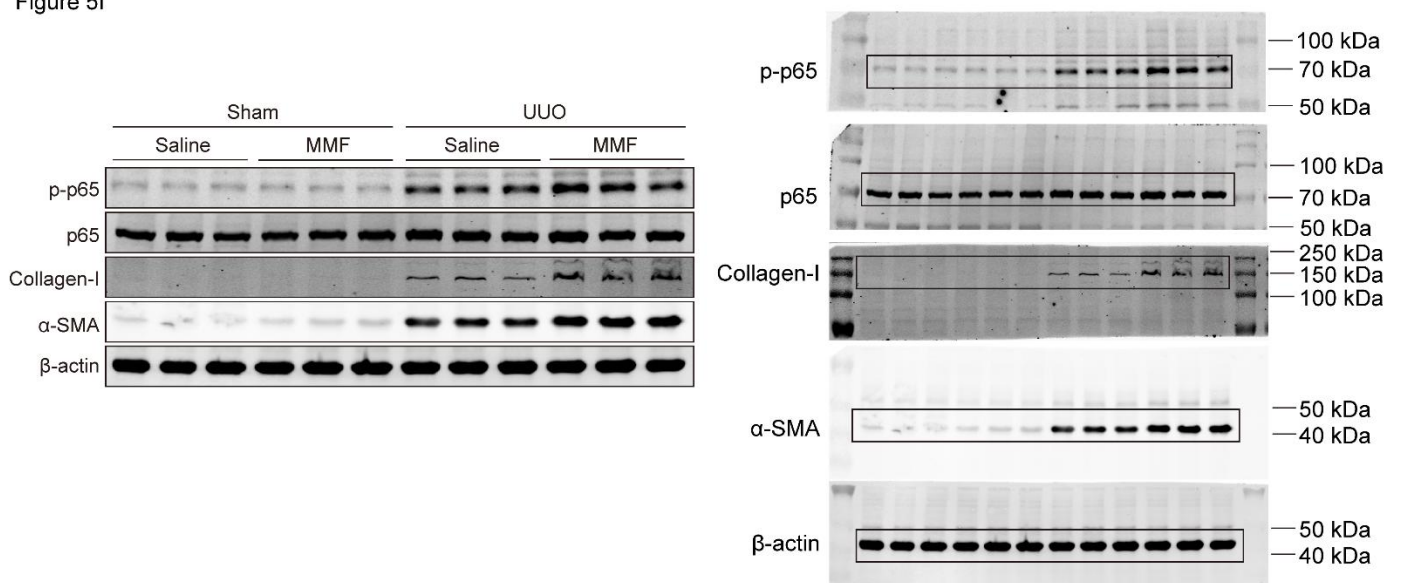

Figure 6E

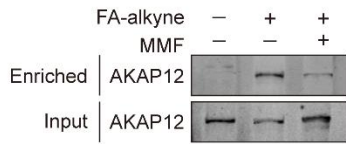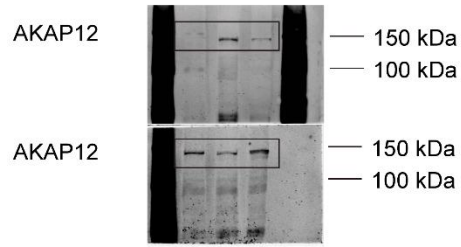

Figure 6F

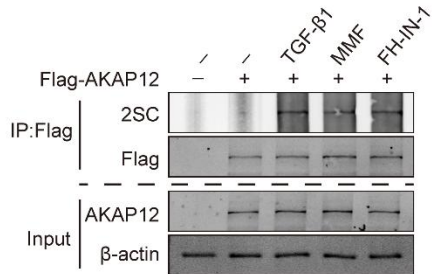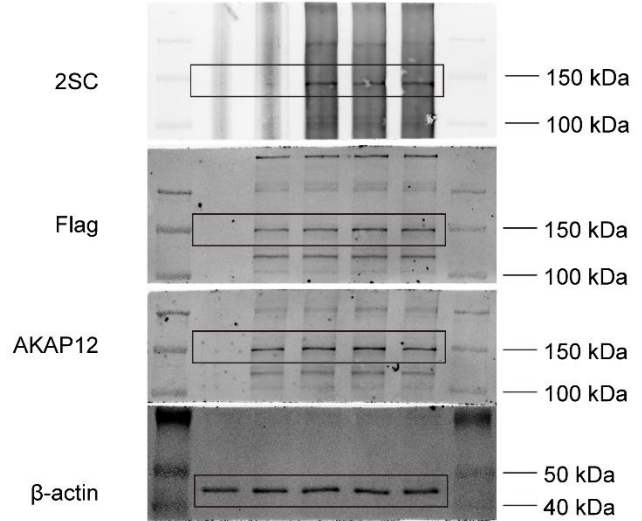

Figure 6H

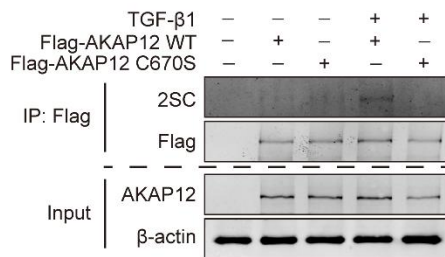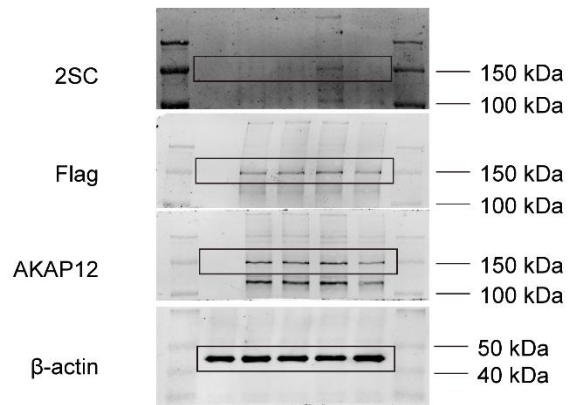

Figure 6I

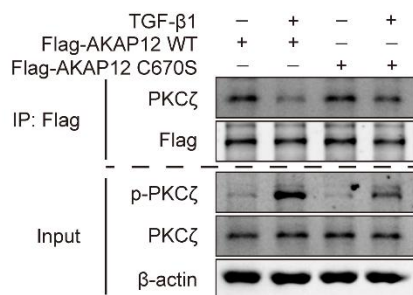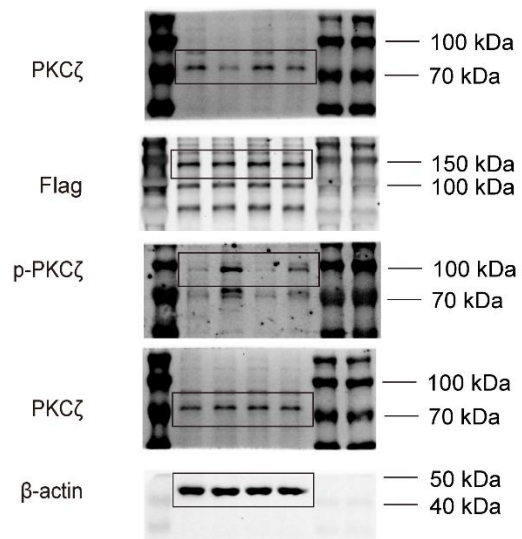

Figure 6J

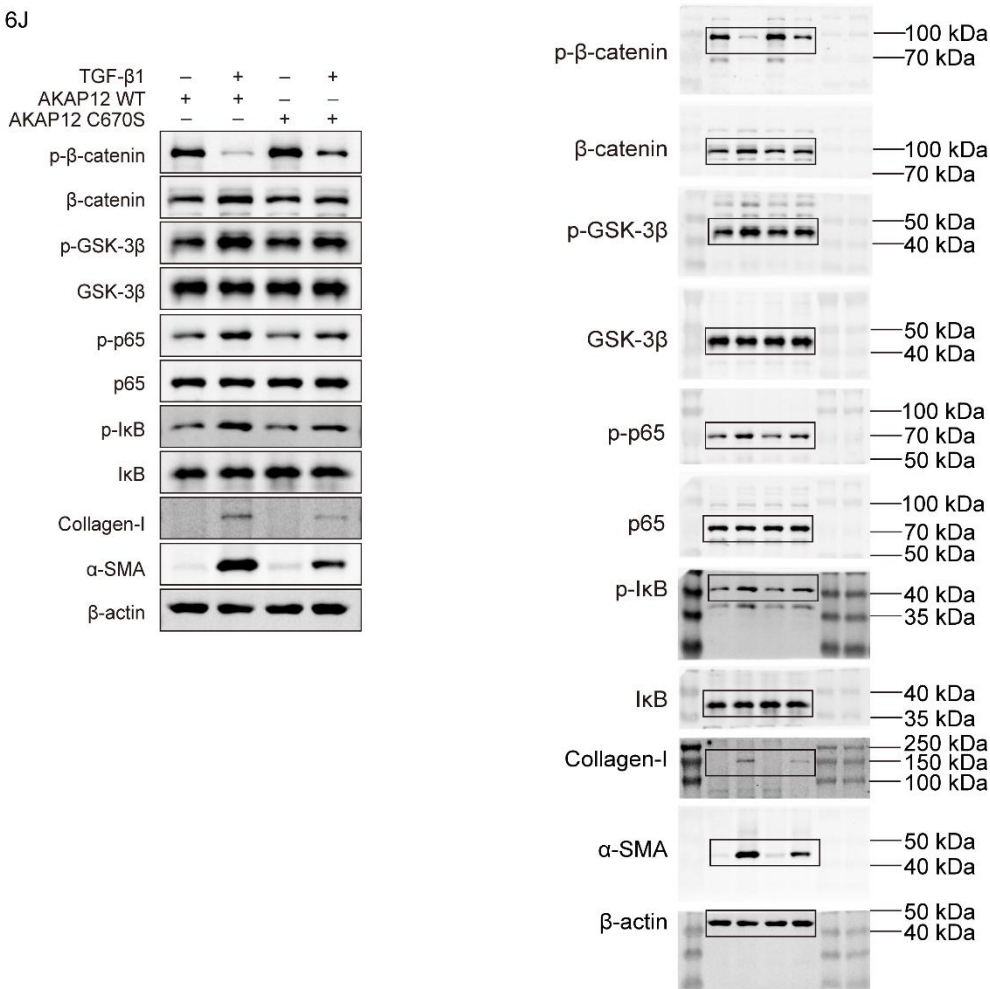

Figure 7E

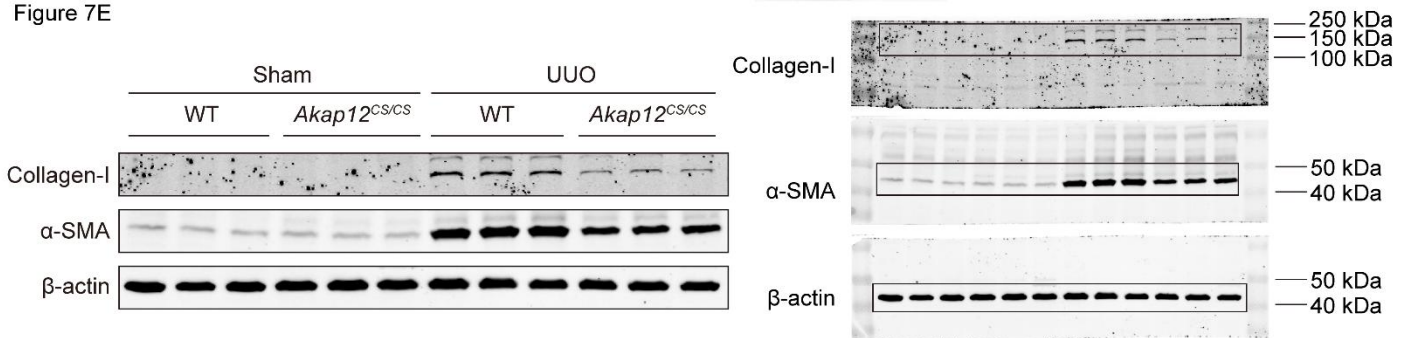

Figure 7F

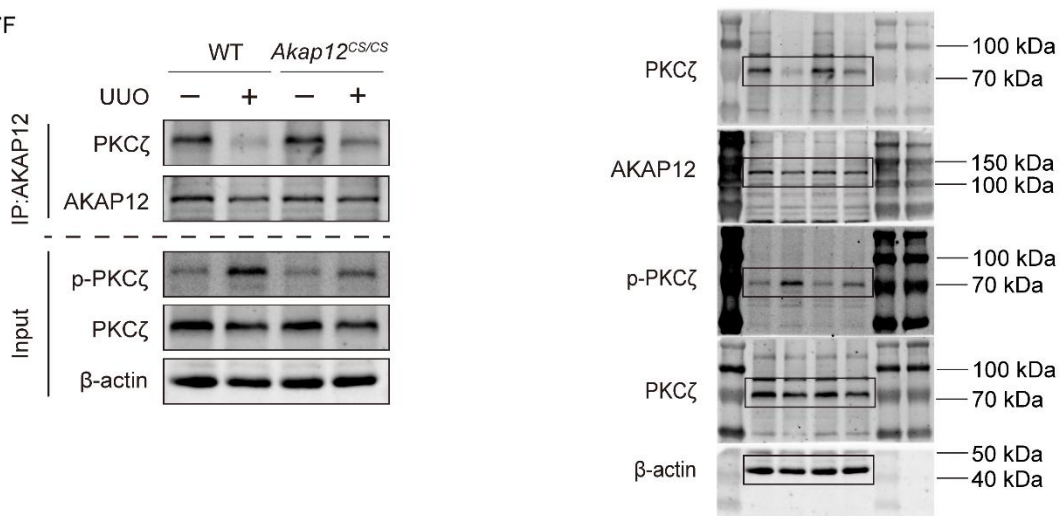

Figure 7G

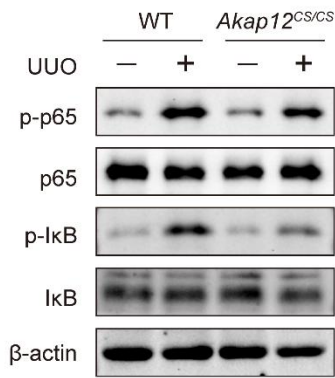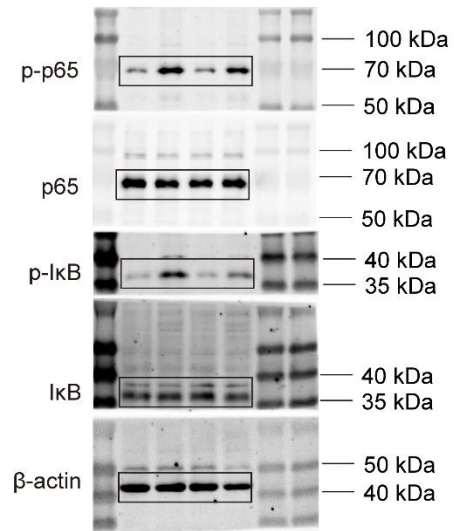

Figure 7H

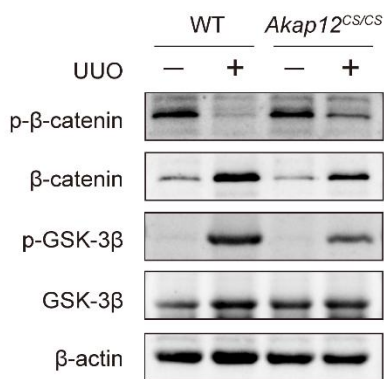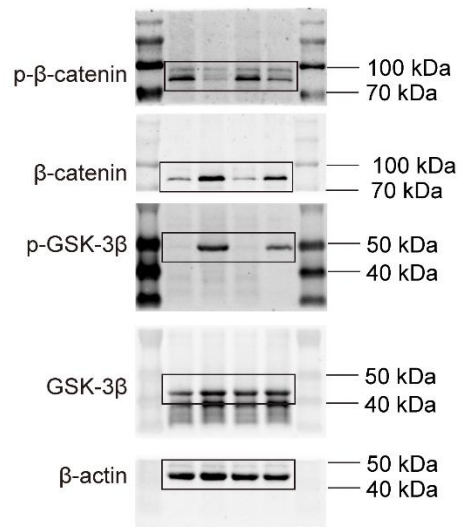

Figure 8F

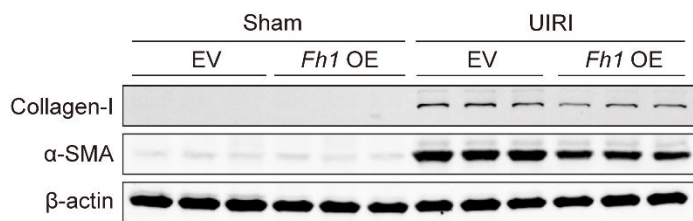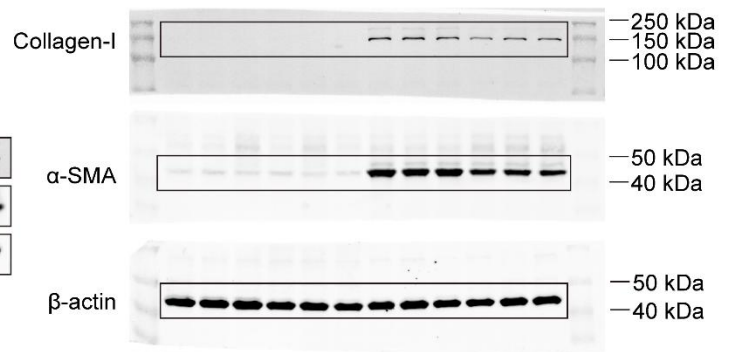

Supplemental Figure 2H

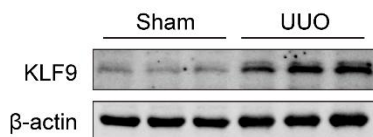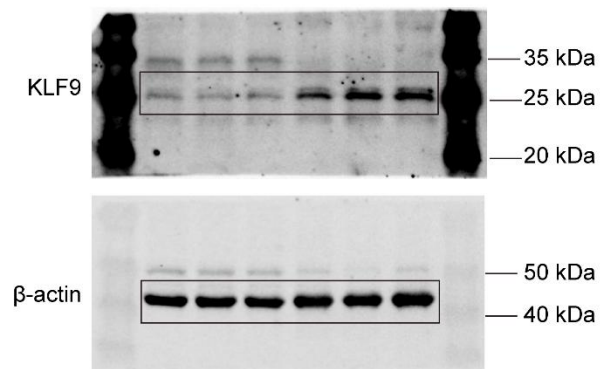

Supplemental Figure 2K

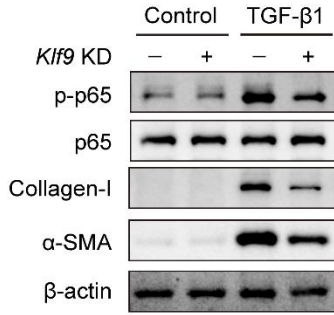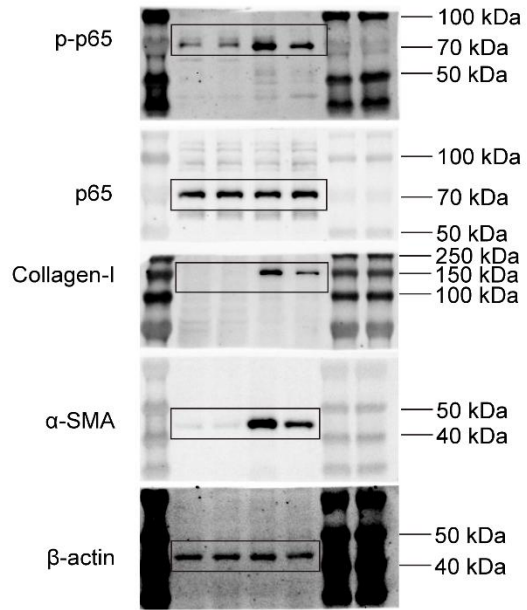

Supplemental Figure 3H

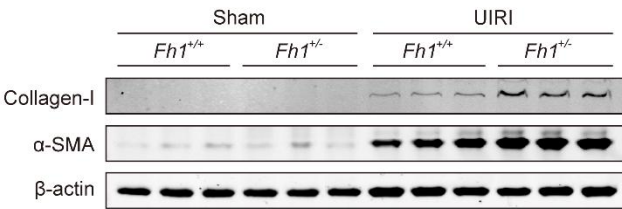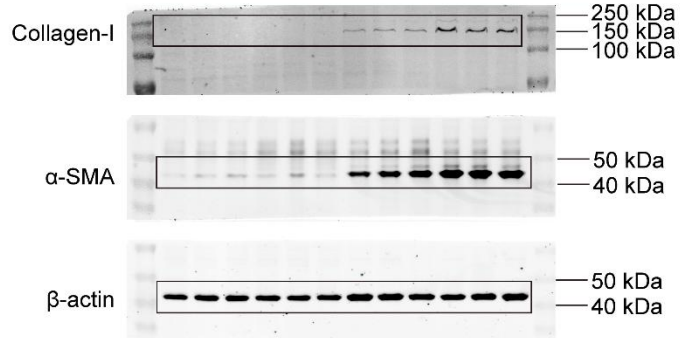

Supplemental Figure 5C

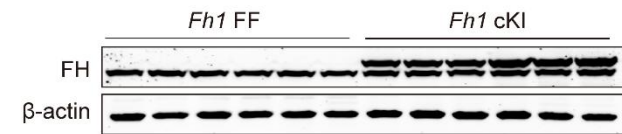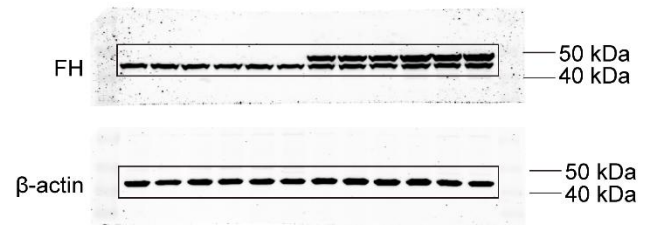

Supplemental Figure 5D

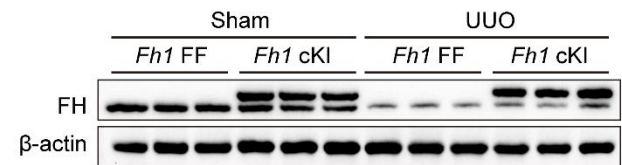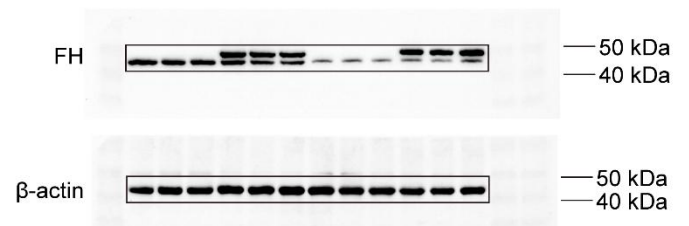

Supplemental Figure 7B

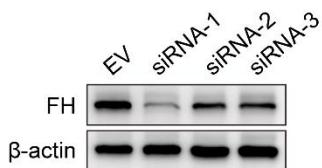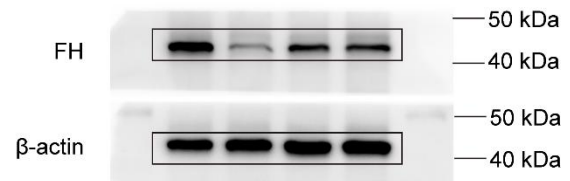

Supplemental Figure 7E

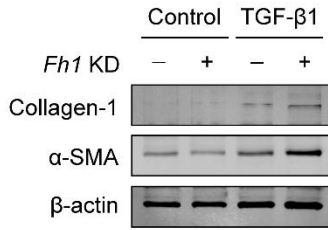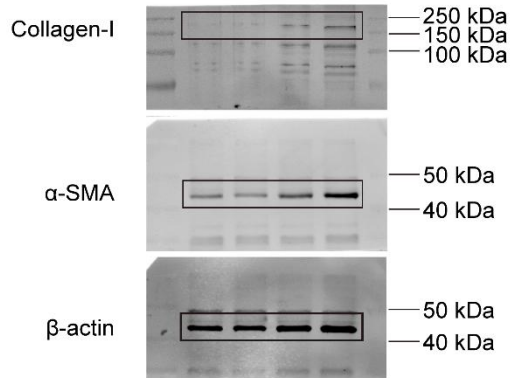

Supplemental Figure 7G

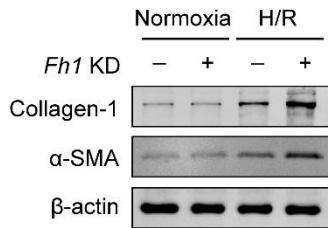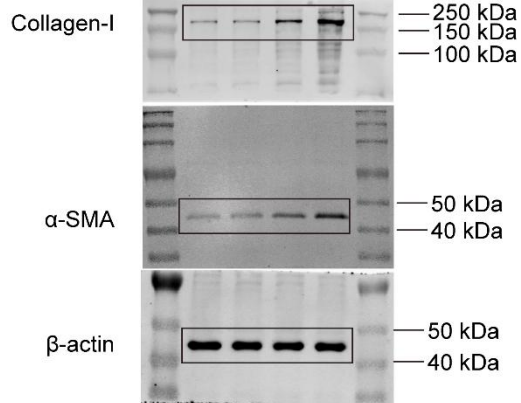

Supplemental Figure 8B

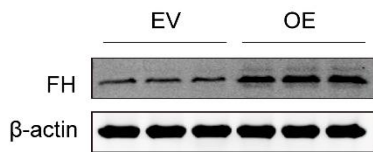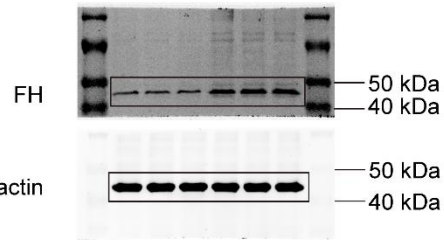

Supplemental Figure 8E

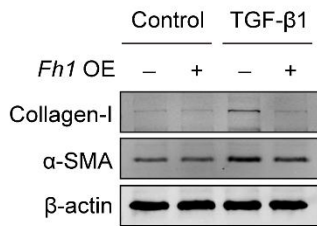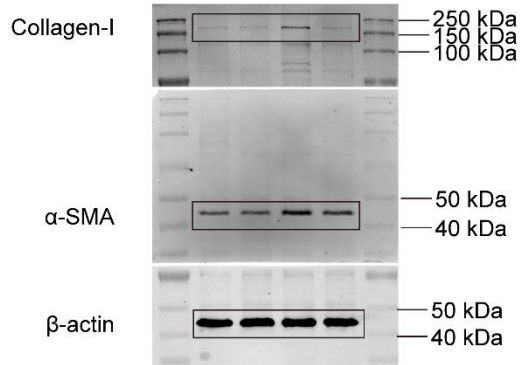

Supplemental Figure 8G

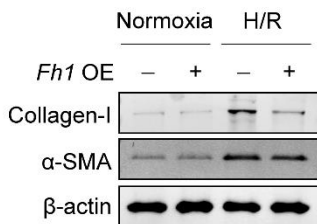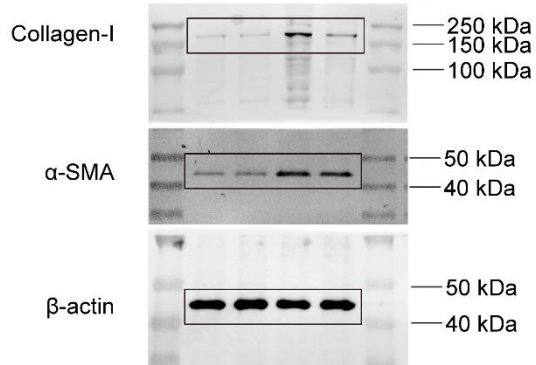

Supplemental Figure 9B

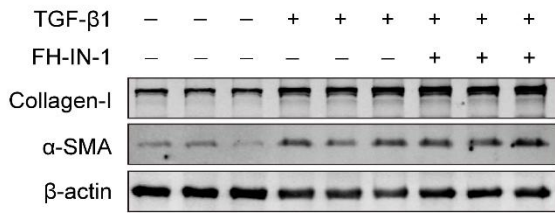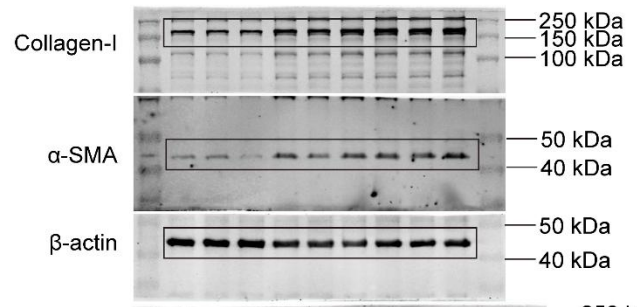

Supplemental Figure 12J

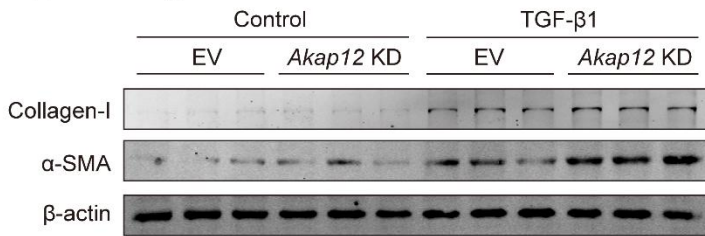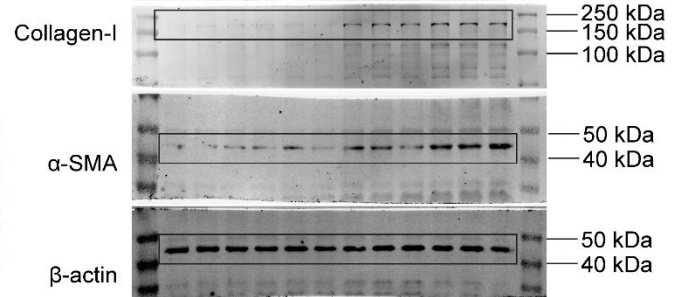

Supplemental Figure 13A

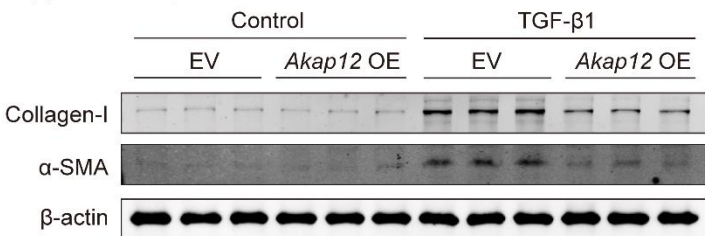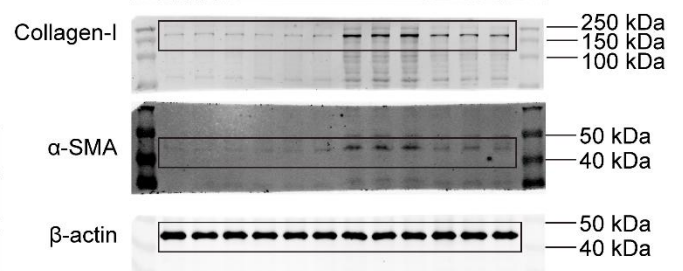

Supplemental Figure 13C

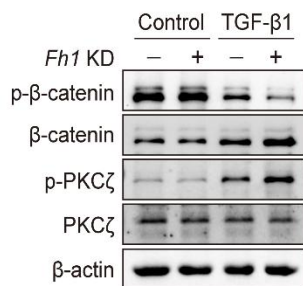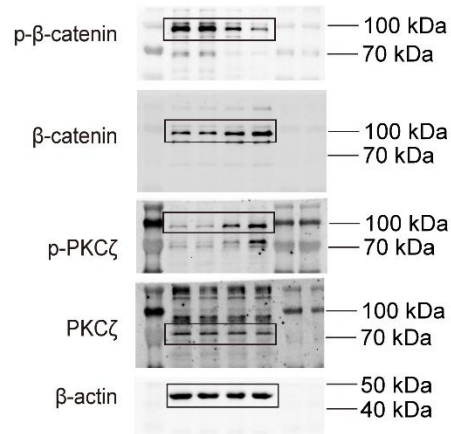

Supplemental Figure 13D

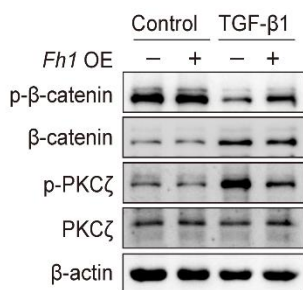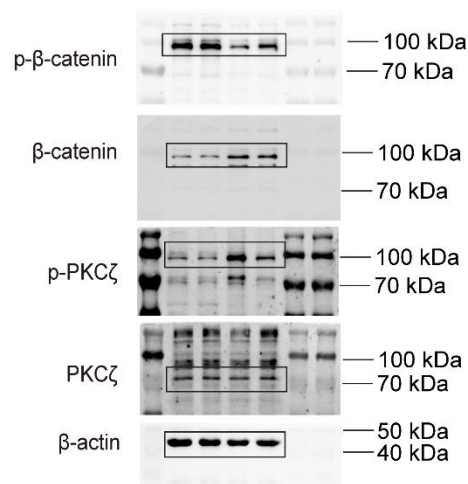

Supplemental Figure 13E

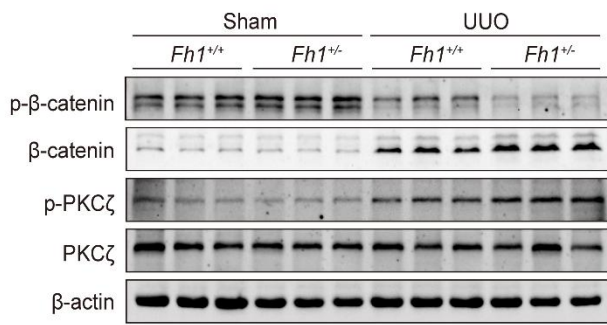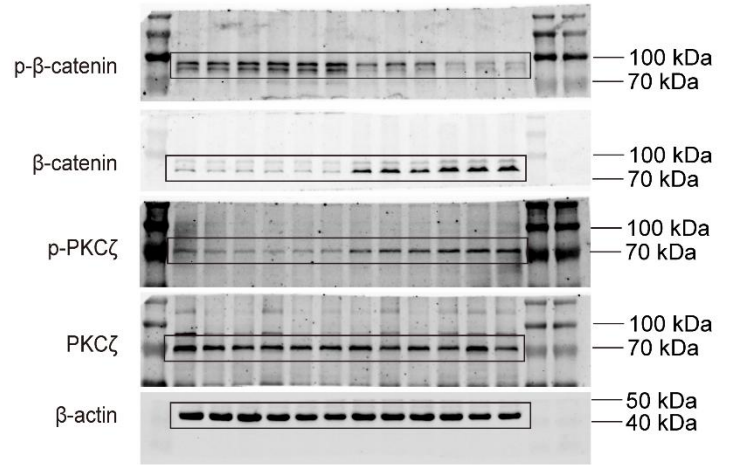

Supplemental Figure 13F

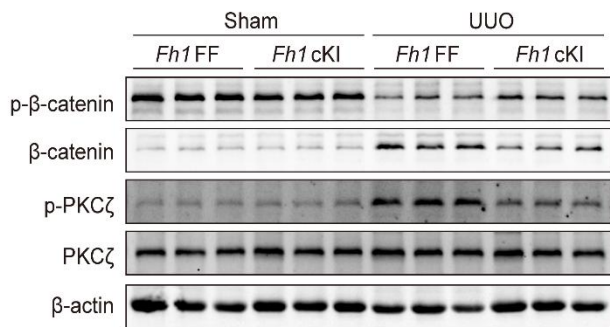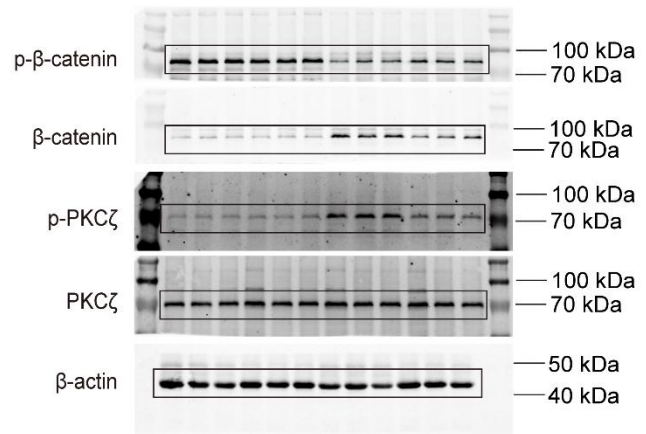

Supplemental Figure 15D

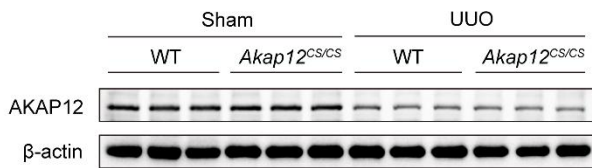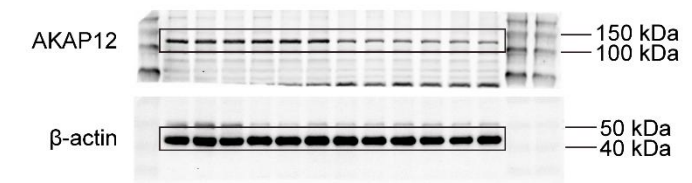

Supplemental Figure 15H

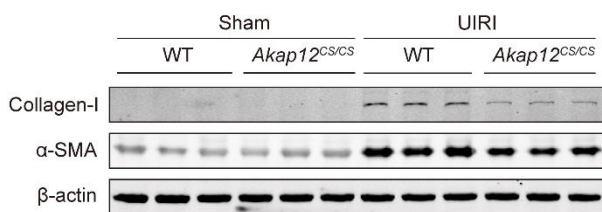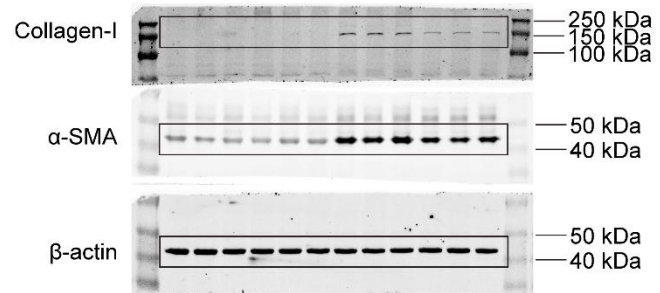

Supplemental Figure 18F

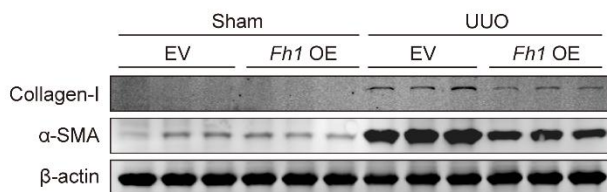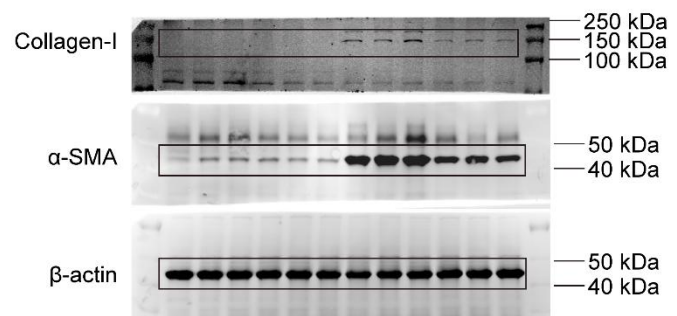

Supplement: sd1 [file 1]
